# Supplementary material for: Neural correlates of motor-cognitive dual-tasking in young and old adults
Source: PLoS One. 2017 Dec 8;12(12):e0189025. doi: 10.1371/journal.pone.0189025 (PMC5722310; doi:10.1371/journal.pone.0189025)
Supplement: S3 Appendix — Root-mean-square error (RMSE) angle between the avatar and the vertical during balance and dual-tasking, percentage trials with a correct answer on the calculation task during calculation and dual-tasking, and performance decline from single- to dual-tasking. (DOCX) [file pone.0189025.s003.docx]

## Sheet: Sheet1
Behavioral data
	Group	RMS error		% correct calculation		Dual Task Costs
		Balance	Dual Task	Calculation	Dual Task	Balance	Calculation	Total
Y1D	Young	9.90692	10.523	91.6667	100	-6.21835	9.09091	1.43628
Y1K	Young	10.7662	11.9116	91.6667	91.6667	-10.6387	0	-5.31933
Y1L	Young	12.8279	12.3936	83.3333	100	3.38573	20	11.6929
Y1N	Young	12.2298	13.7819	50	50	-12.6919	0	-6.34594
Y1Q	Young	19.9472	22.2702	91.6667	58.3333	-11.6454	-36.3636	-24.0045
Y1T	Young	9.08985	10.2351	83.3333	100	-12.5991	20	3.70046
Y2E	Young	8.52741	9.58425	91.6667	91.6667	-12.3934	0	-6.19671
Y2F	Young	14.68	13.7252	83.3333	91.6667	6.504	10	8.252
Y2R	Young	11.7353	12.088	75	75	-3.00502	0	-1.50251
Y2U	Young	9.58468	11.2219	91.6667	100	-17.0817	9.09091	-3.99539
Y2X	Young	10.3581	11.1056	75	83.3333	-7.21693	11.1111	1.94709
Y2Z	Young	14.3083	14.1373	91.6667	66.6667	1.19491	-27.2727	-13.0389
Y3A	Young	10.4466	10.0033	100	100	4.24358	0	2.12179
Y3B	Young	12.5339	12.6447	91.6667	91.6667	-0.883865	0	-0.441933
Y3C	Young	9.25506	9.84783	100	100	-6.4049	0	-3.20245
Y3G	Young	9.60472	9.81285	100	91.6667	-2.16694	-8.33333	-5.25014
Y3J	Young	9.23991	9.92097	83.3333	91.6667	-7.37083	10	1.31458
Y3M	Young	10.7296	12.1421	41.6667	25	-13.1644	-40	-26.5822
Y3X	Young	12.0471	13.6996	75	58.3333	-13.7172	-22.2222	-17.9697
Y4A	Young	9.36362	10.9003	91.6667	100	-16.4108	9.09091	-3.65995
Y4K	Young	8.96282	9.17585	75	83.3333	-2.37692	11.1111	4.3671
Y4Z	Young	8.67499	9.57577	100	100	-10.3837	0	-5.19183
Y5P	Young	9.69151	10.2698	100	75	-5.96749	-25	-15.4837
1a9r1y	Old	13.3246	15.5253	66.6667	58.3333	-16.5165	-12.5	-14.5082
1c9q2a	Old	13.9999	20.2903	58.3333	25	-44.9319	-57.1429	-51.0374
1l9w3s	Old	17.8336	17.0866	100	91.6667	4.18864	-8.33333	-2.07235
1r9o8d	Old	11.8598	17.7253	83.3333	83.3333	-49.4571	0	-24.7286
1w9e8l	Old	9.19239	9.89623	91.6667	75	-7.65678	-18.1818	-12.9193
2l8z9k	Old	9.87412	10.0722	100	91.6667	-2.00608	-8.33333	-5.16971
3k7u6l	Old	11.4529	17.0932	83.3333	91.6667	-49.2471	10	-19.6235
3p7o4j	Old	17.6985	25.0809	33.3333	50	-41.712	50	4.144
3q7i5y	Old	13.3262	11.8755	83.3333	91.6667	10.8861	10	10.443
4h6t8g	Old	16.2315	16.6099	50	50	-2.33105	0	-1.16552
4j6i3m	Old	18.906	18.0457	75	75	4.5505	0	2.27525
4k6q8x	Old	17.7439	19.4274	83.3333	75	-9.48775	-10	-9.74387
4n6z1b	Old	14.2139	14.6333	91.6667	66.6667	-2.95023	-27.2727	-15.1115
4o6p1k	Old	10.058	9.95771	75	58.3333	0.997329	-22.2222	-10.6124
4t3p3h	Old	8.91036	8.77892	58.3333	66.6667	1.47522	14.2857	7.88047
5h5o2n	Old	29.1602	32.5064	50	41.6667	-11.4753	-16.6667	-14.071
5n5p7s	Old	22.9542	22.8677	83.3333	58.3333	0.376972	-30	-14.8115
6f4u4j	Old	19.1792	18.0042	50	25	6.12613	-50	-21.9369
6n4r5k	Old	15.1122	14.0025	75	58.3333	7.3428	-22.2222	-7.43971
6u4w5m	Old	12.0038	13.3286	91.6667	100	-11.0364	9.09091	-0.972764
6v4i5c	Old	10.4882	12.3369	91.6667	66.6667	-17.6264	-27.2727	-22.4496
7b3t8l	Old	20.994	18.0447	77.7778	66.6667	14.0485	-14.2857	-0.118607
7z3e8n	Old	20.1971	23.2127	91.6667	66.6667	-14.9311	-27.2727	-21.1019
8d2w7c	Old	24.1069	20.1044	83.3333	41.6667	16.6033	-50	-16.6983
8f2t2d	Old	10.4684	10.8725	66.6667	91.6667	-3.8597	37.5	16.8202
8s2o2l	Old	17.2339	13.5105	50	50	21.6049	0	10.8024
8t2r9b	Old	13.8167	17.2329	33.3333	41.6667	-24.7251	25	0.137454
8v2z7m	Old	14.7131	15.425	58.3333	66.6667	-4.83921	14.2857	4.72325
9e1w5k	Old	14.4567	18.5715	91.6667	66.6667	-28.4633	-27.2727	-27.868
9s1e4x	Old	19.8452	18.2169	100	83.3333	8.20494	-16.6667	-4.23086
9x1r5h	Old	12.9731	13.3578	75	66.6667	-2.96542	-11.1111	-7.03827
9y1q6a	Old	14.6733	19.3259	75	75	-31.7079	0	-15.854
Note: subjects colored in red were outliers and therefore excluded from analysis
