# Supplementary material for: Neural correlates of motor-cognitive dual-tasking in young and old adults
Source: PLoS One. 2017 Dec 8;12(12):e0189025. doi: 10.1371/journal.pone.0189025 (PMC5722310; doi:10.1371/journal.pone.0189025)
Supplement: S4 Appendix — (DOCX) [file pone.0189025.s004.docx]

## Sheet: MNI coordinates
Conjunction Young Balance & Young Calculation & Old Balance & Old Calculation;
Coordinates of peak voxels:
0	0	60		SMA
-54	6	18		L Prefrontal
33	18	6		R Insula
30	0	57		R medial frontal gyrus + inferior operculum
-36	-54	-30		Cerebellum crus 1
36	-54	-27		Cerebellum 6 R
48	-36	48		R inferior parietal gyrus
-42	-42	57		L superior parietal gyrus + L inferior parietal gyrus

## Sheet: Beta values
Extracted beta values from individual peak voxels per cluster:
	SMA			Prefrontal			Insula			Frontal			Cerebellum crus 1			Cerebellum 6			Right parietal			Left parietal
	Balance	Calculation	Dual task	Balance	Calculation	Dual task	Balance	Calculation	Dual task	Balance	Calculation	Dual task	Balance	Calculation	Dual task	Balance	Calculation	Dual task	Balance	Calculation	Dual task	Balance	Calculation	Dual task
Y1D	2.7	2.08	2.85	0.75	2.57	2.23	1.6266	1.75	1.52	1.11	4	3.62	0.46	1.15	0.79	0.3	1.93	1.54	0.68	2.35	1.91	0.66	2.23	1.87
Y1K	1	3.39	3.18	0.49	2.05	1.66	0.4264	0.89	0.83	0.52	0.94	0.8	0.22	0.7	0.16	0.61	1.34	1.09	-0.19	0.49	0.21	0.27	1.61	1.5
Y1L	1.5	2.4	2.95	1.54	1.73	2.1	1.2368	1.46	1.51	1.95	0.86	1.36	0.84	0.68	1.12	1.18	0.74	1.49	2.3	0.52	1.59	1.49	0.79	1.63
Y1N	2.5	1.31	2.48	1.71	1.08	2.4	1.1467	0.92	1.29	1.73	0.61	1.86	0.98	0.85	0.86	0.72	0.29	0.96	1.84	0.02	1.6	0.84	1.14	1.89
Y1Q	1.2	1.58	2.18	1.01	0.95	1.78	1.0449	0.89	1.43	1.07	1.32	1.99	0.84	0.89	1.96	0.5	0.78	1.41	1.12	0.72	1.45	1.18	0.29	1.11
Y1T	2.7	1.56	2.3	1.13	1.43	1.52	3.2638	2.42	2.66	2.38	3.06	3.1	1.17	1.8	1.58	0.99	1.61	1.62	1.35	1.26	1.34	1.84	1.19	1.2
Y2E	0.7	2.26	2.38	0.52	1.12	1.31	0.332	1	0.9	0.19	1.59	1.8	0.33	0.4	0.44	1.05	0.48	1.15	0.89	1.81	2.3	0.05	1.48	1.48
Y2F	1.4	1.67	1.64	2.29	1.93	1.33	1.0791	0.19	0.08	1.81	0.84	1.39	0.83	0.59	0.42	0.45	0.85	0.85	0.5	0.61	0.22	1.05	1.2	0.87
Y2R	0.9	2.2	2.77	0.84	1.45	1.7	1.2568	1.08	1.38	1.21	0.88	1.19	0.93	0.68	1.33	0.17	0.85	0.84	0.4	0.64	0.87	0.37	1.45	1.65
Y2U	1.5	1.52	2.11	0.94	1.27	1.47	1.0586	1.41	1.86	1.5	1.99	2.58	0.56	0.95	1.11	0.38	1.24	1.29	1.26	2.16	2.22	1.04	2.03	1.95
Y2X	0.5	0.89	1.21	0.4	2.44	3.13	0.2905	0.62	0.88	0.85	1.9	2.48	0.12	0.5	0.71	0.62	0.54	1.09	0.45	1.29	1.64	0.58	0.67	0.94
Y2Z	1.8	0.93	2.08	1.71	1.44	2.08	1.594	0.38	1.05	1.7	0.44	1.36	1.6	0.77	1.52	1.64	1.18	1.78	1.21	0.74	1.37	0.64	1.94	1.7
Y3A	2.1	1.77	2.04	1.37	1.6	2.5	0.5991	1.82	1.75	1.68	1.56	1.68	0.93	0.33	0.27	1.07	0.5	0.75	0.83	1.17	1.39	1.04	2.47	2.59
Y3B	1.2	1.4	1.96	0.77	0.79	0.96	1.1653	1.12	1.67	0.9	0.9	1.18	0.88	1.44	1.68	1.61	0.36	1.2	0.36	1.39	1.17	0.2	0.94	0.67
Y3C	2.6	2	3.2	1.52	1.83	2.26	1.6483	0.93	1.84	2.08	1.78	2.89	1.16	1.14	1.74	0.76	1.35	1.9	0.72	1.9	1.77	1.39	1.91	2.23
Y3G	2.6	1.18	2.83	1.71	3.93	4.37	2.401	1.74	2.63	2.18	1.9	2.32	1.29	1.35	1.7	1	1.2	1.74	2.09	1.71	2.54	1.64	2.97	3.16
Y3J	1.9	1.66	3.1	1.14	1.33	1.53	1.6113	1.34	2.21	1.15	1.66	2.11	0.54	0.57	0.65	0.58	0.73	1.16	0.3	1.36	0.94	0.37	1.47	1.24
Y3M	1	0.84	1.26	0.32	1.74	1.8	1.2165	1.09	1.51	0.95	0.28	1.03	0.06	0.46	0.84	0.17	0.8	1.11	0.74	1.17	1.56	0.69	1.22	1.35
Y3X	1.4	1.77	1.7	1.8	2.18	3.01	0.9854	1.36	1.42	1.12	1.05	1.72	0.46	0.68	0.62	0.51	1.24	2.35	0.82	0.34	0.54	0.69	1.31	1.36
Y4A	2.2	2.03	2.87	0.57	1.3	1.4	1.4916	2.11	3.08	1.83	1.63	2.19	0.7	1.3	1.48	1.51	0.91	1.61	0.88	0.95	1.57	0.16	1.79	0.84
Y4K	1.5	1.92	2.52	1.72	0.96	2.23	1.4639	1.37	1.7	2.75	0.73	2.76	1.41	1	1.72	1.01	0.81	1.81	0.93	0.95	1.27	0.84	1.15	1.45
Y4Z	4.4	2.25	4.32	1.55	1.69	1.76	1.2464	1.48	1.74	2.3	1.15	1.83	1.87	0.9	1.59	0.81	1.71	1.53	1.03	2.69	1.48	1.37	2.41	2.37
Y5P	0.5	3.09	3.13	1.07	2.09	2.75	0.3378	1.61	1.9	0.95	1.66	2.39	0.72	0.92	0.53	0.3	1.44	1.13	1.03	1.87	1.87	0.55	2.2	2.21
1a9r1y	2.4	2.13	2.78	1.34	2.34	3.17	1.6961	1.4	2.16	1.41	0.94	1.57	1.49	1.24	2.57	1.5	2	3.14	0.61	0.61	0.68	1.26	1.89	1.97
1c9q2a	0.6	1.52	1.89	1.18	0.72	2.05	0.5989	0.48	0.71	1.18	0.83	1.71	0.24	1.3	1.62	-0.11	0.15	0.33	0.15	0.99	1.23	0.14	0.21	0.52
1l9w3s	2.4	1.4	2.64	1.04	2.09	1.83	2.334	0.97	2.09	1.83	0.53	1.22	1.57	0.89	1.95	1.76	1.02	2.32	2.56	0.38	1.76	1.54	0.99	1.65
1r9o8d	2	3.87	4.07	1.49	2.62	2.98	2.4239	1.57	1.9	1.56	1.53	2.04	1.17	1.69	2.25	1.4	2.4	2.71	1.53	0.95	1.82	2.35	1.18	2.34
2l8z9k	0.5	0.54	0.91	0.26	0.86	0.7	0.4357	0.5	0.3	0.31	0.68	0.77	0.41	-0.02	0.52	0.14	0.27	0.56	0.54	0.5	0.62	0.07	1.25	0.9
3k7u6l	1.5	0.95	1.73	1.88	1.33	2.23	0.8163	0.24	0.78	0.91	0.52	0.85	-0.26	0.42	0.19	0.85	0.93	1.32	0.95	1	1.07	1.04	0.91	1.25
3p7o4j	2.4	3.34	4.09	0.84	1.01	1.11	1.7628	1.02	1.62	2.82	1.73	2.9	1.29	1.34	1.58	0.83	1.61	1.91	1.09	0.51	1.08	0.4	1.63	1.85
3q7i5y	1.1	0.13	1.19	1.35	2.04	3.1	1.8514	1.45	2.4	0.69	0.64	0.92	0.78	1.12	1.76	2.45	1.52	3.66	1.12	0.46	1.48	1.17	0.68	1.38
4h6t8g	0.4	0.46	0.4	0.52	1.11	1.44	0.3774	0.79	0.73	0.85	0.99	1.29	0.75	0.8	1.17	0.18	1.01	1.41	0.35	0.43	0.38	0.3	0.33	0.5
4j6i3m	3.7	2.95	3.45	2.35	2.38	2.8	2.6427	1.65	1.73	2.67	2.49	2.07	2.01	1.68	3.03	2.15	2.52	2.96	1.48	1.49	1.38	2.99	3.14	3.77
4k6q8x	2.4	2.52	3.06	1.58	1.62	2.17	1.9655	1.56	1.91	1.84	2.5	2.85	0.9	2.13	2.58	0.98	3.5	4.14	2.13	1.39	1.78	0.96	1.13	1.41
4n6z1b	1.9	0.32	0.81	1.19	1.31	2.05	1.3537	0.39	1.06	1.74	0.97	1.74	1.48	0.57	1.4	2.56	0.14	1.73	1.25	0.46	1.03	1.35	1.01	1.47
4o6p1k	0.9	0.96	0.88	1.92	0.65	1.95	1.1998	0.75	0.74	2.02	0.83	1.88	0.67	0.8	1.04	0.52	0.96	1.27	0.46	0.53	0.68	0.93	0.83	1.12
4t3p3h	1.2	1.96	2.43	1.53	1.81	2.76	1.4225	0.88	1.27	1.13	0.57	1.08	1.08	0.94	1.61	0.76	1.23	1.52	0.68	0.68	0.85	0.8	0.77	0.99
5h5o2n	3.8	1.01	2.11	1.54	0.78	0.21	2.2176	1.41	2.71	1.31	0.98	1.49	2	1.95	2.66	0.35	1.86	2.04	0.87	0.32	0.74	0.76	0.55	1.1
5n5p7s	2.4	0.84	2.06	1.61	3.82	3.63	1.3744	0.9	0.96	2.9	1.33	2.28	1.27	0.83	1.43	0.28	0.59	0.43	2	2.2	2.58	1.26	3.62	3.18
6f4u4j	2.8	1.71	2.43	2.34	2.24	3.03	2.1283	0.35	0.77	2.4	1.25	1.88	3.27	2.09	3.03	3.62	2.4	3.2	2.37	0.96	1.38	1.25	0.75	0.65
6n4r5k	1.3	1.67	2.31	2.18	1.31	1.92	1.8734	1.62	2.08	2.03	1.82	2.03	0.79	1.56	1.59	2.17	1.51	2.33	0.93	1.25	1.13	1.55	0.73	1.1
6u4w5m	1.8	1.39	1.53	1.63	0.87	1.74	2.1227	0.9	1.56	1.54	0.83	1.32	0.57	0.29	0.47	0.43	0.99	0.26	1.31	1.12	1.38	1.05	0.52	1.2
6v4i5c	1.5	1.81	3.12	1.73	1.94	3.17	0.8008	1.25	1.81	1.51	1.2	2.37	0.54	0.74	1.08	0.59	1.26	1.6	1.45	1.45	2.58	1.45	3.09	3.93
7b3t8l	1.3	1.64	1.63	0.71	0.73	0.69	1.3762	1.29	1.09	0.88	1.07	0.84	1.42	0.76	0.97	0.61	0.51	0.81	0.76	0.79	0.79	0.02	1	1.08
7z3e8n	3.4	1.45	2.23	2.79	0.32	1.26	3.772	1.98	3.22	3.19	0.79	1.66	2.08	1	2.05	1.11	2.23	2.53	1.89	0.93	1.46	1.01	0.14	0.21
8d2w7c	1	0.59	1.23	1.34	2.25	3.41	1.2367	1.16	1.23	0.45	0.97	1.3	0.44	0.84	1.32	1.13	1.67	2.35	0.2	0.71	0.93	0.53	0.75	1
8f2t2d	3.3	1.21	2.57	1.96	1.36	2.54	1.5918	0.97	1.23	2.37	1.27	2.77	1.08	0.83	1.22	1.71	1.48	2.14	1.39	0.9	1.47	2.11	0.77	1.68
8s2o2l	3.2	1.86	2.68	1.46	0.3	0.98	2.352	1.05	2.02	3.42	0.75	2.3	1.28	0.99	1.25	0.88	1.69	1.32	1.48	0.41	1.29	1.59	0.59	1.24
8t2r9b	1.4	0.85	0.99	0.42	2.07	2.17	1.2946	0.6	1.05	1.38	0.9	1.38	0.87	0.45	0.7	1.25	1.2	1.26	0.32	0.26	0.21	0.8	0.09	0.67
8v2z7m	1.9	1.33	1.69	1.03	1.49	1.08	1.0947	1.22	1.19	0.5	1.46	1.44	1.21	0.83	0.81	1.28	0.77	0.61	1.25	1.18	1.31	1.09	0.3	0.57
9e1w5k	2.3	1.47	3.27	2.14	1.39	2.93	2.3264	0.32	1.56	2.17	0.59	2.02	2.05	0.05	1.48	1.52	1.19	2.84	0.67	0.55	0.51	1.06	0.37	0.94
9s1e4x	2.3	1.6	2.07	2.01	1.28	1.88	2.2329	3.02	2.82	2.08	1.53	2.17	1.71	1.24	1.41	0.62	0.7	1.01	2.3	1.04	1.67	3.53	1.29	2.58
9x1r5h	1.3	3.16	3.44	1.8	3.48	3.07	1.0407	2.02	1.8	0.98	2.28	2.08	1.31	2.5	2.13	2.2	1.78	2.01	1.07	1.22	1.21	0.92	0.96	1.15
9y1q6a	1.6	1.09	1.42	1.79	1.35	1.75	2.2494	2.03	1.94	1.43	1.22	1.33	0.89	0.49	0.74	-0.11	1.73	1.1	0.44	1.19	1.04	0.58	1.44	1.33
1w9e8l	4.3	0.94	4.67	1.33	2.83	3.49	1.2745	1.24	1.84	1.4	1.19	1.89	0.8	0.97	1.09	1.57	1.54	2.14	1	1.07	1.46	0.68	1.5	1.92

## Sheet: Upregulation
	Group	Percentage upregulation from single to dual task
		SMA	Prefrontal	Insula	Frontal	Cerebellum Crus 1	Cerebellum 6	Right parietal	Left parietal
Y1D	Young	18.87	34.23	-9.95	41.61	-1.3	38.46	26.09	29.64
Y1K	Young	45.66	30.87	26.17	10.31	-65.12	11.62	42.8	59.77
Y1L	Young	49.74	28.2	11.95	-3.24	47.91	54.75	12.25	42.85
Y1N	Young	28.96	71.52	24.89	58.99	-5.38	89.59	71.67	90.17
Y1Q	Young	54.36	81.55	47.84	66.12	126.29	120.51	58.38	51.01
Y1T	Young	8.09	18.7	-6.47	13.89	6.2	24.32	2.69	-20.9
Y2E	Young	59.94	60.12	35.44	102.6	21.42	50.47	70.3	92.78
Y2F	Young	6.13	-36.8	-87.09	4.35	-40.74	30.99	-61.39	-22.65
Y2R	Young	81.18	48.68	18.12	14.08	65.25	64.73	66.91	80.74
Y2U	Young	41.22	32.85	50.44	47.7	47.45	59.34	29.88	26.97
Y2X	Young	75.4	120.37	94.19	80.12	127.16	87.29	87.94	50.26
Y2Z	Young	53.96	32.17	6.77	26.84	28.91	26.45	40.36	31.5
Y3A	Young	5.27	68.73	45.2	3.58	-56.89	-4.8	38.49	47.05
Y3B	Young	48.72	23.28	46.35	30.99	45.15	21.14	33.93	18.07
Y3C	Young	39.96	35.05	43.25	49.84	51.07	80.36	34.76	34.88
Y3G	Young	48.64	54.79	26.86	13.29	28.84	57.66	33.77	37.05
Y3J	Young	74.62	23.53	49.36	50.12	15.8	76.6	13.36	34.93
Y3M	Young	41.08	75.34	30.62	68.54	226.31	128.84	63.81	41.74
Y3X	Young	7.59	51.37	21.34	59.09	8.68	168.19	-7.13	35.62
Y4A	Young	36.77	49.47	71.28	26.66	47.72	32.92	70.86	-13.35
Y4K	Young	46.96	66.59	19.75	58.84	42.49	99.25	34.85	45.81
Y4Z	Young	30.42	8.48	27.53	6.4	14.55	22.02	-20.16	25.38
Y5P	Young	74.24	74.33	94.94	83.22	-36.08	29.7	29.11	60.48
1a9r1y	Old	23.82	72.14	39.43	34.02	87.96	79.67	12.6	25.09
1c9q2a	Old	82.28	114.94	32.17	70.01	110.59	1472.55	115.48	194.81
1l9w3s	Old	37.58	17.24	26.69	3.71	58.22	66.39	19.9	31.24
1r9o8d	Old	38.88	44.93	-4.88	32.1	57.83	42.44	46.7	33.04
2l8z9k	Old	67.32	23.97	-36.02	54.26	169.64	170.35	19.73	36.66
3k7u6l	Old	41.94	39.29	47.9	19.2	132.53	48.58	9.17	28.13
3p7o4j	Old	43.14	20	16.29	27.34	19.91	56.33	35.52	82.82
3q7i5y	Old	90.52	82.66	45.11	39.59	85.5	84.63	86.39	49.24
4h6t8g	Old	-1.73	76.47	25.29	39.91	50.45	136.17	-3.58	58.08
4j6i3m	Old	3.35	18.39	-19.45	-19.82	64.51	26.67	-6.86	22.9
4k6q8x	Old	24.03	35.9	8.35	31.42	70.33	85.17	1.09	34.7
4n6z1b	Old	-28.24	63.69	21.58	29.01	36.28	28.22	19.84	24.88
4o6p1k	Old	-4.78	51.33	-24.13	31.79	42.2	70.75	38.92	26.57
4t3p3h	Old	51.94	65.19	10.78	26.4	59.66	52.44	24.04	25.6
5h5o2n	Old	-11.31	-81.89	49.85	29.99	34.56	85.01	24.81	68.13
5n5p7s	Old	27.86	33.52	-15.17	7.86	36.8	-1.83	22.57	30.39
6f4u4j	Old	7.11	32.21	-37.58	2.87	13.24	6.27	-17.39	-35.28
6n4r5k	Old	52.51	10.26	18.75	5.88	35.06	26.56	3.52	-3.5
6u4w5m	Old	-2.44	39.33	2.92	11.47	10.56	-63.81	14.23	52.79
6v4i5c	Old	86.04	72.87	76.52	74.96	69.95	73.47	77.61	72.86
7b3t8l	Old	9.26	-4.65	-18.42	-13.34	-10.96	44.67	2.22	110.85
7z3e8n	Old	-8.75	-19.04	11.96	-16.26	33.33	51.73	3.48	-63.15
8d2w7c	Old	50.58	90.03	2.97	82.52	105.57	67.99	104.39	55.69
8f2t2d	Old	15.15	53.23	-4.17	52.45	27.94	34.13	27.66	16.29
8s2o2l	Old	6.91	10.84	18.97	10.35	10.12	2.95	36.54	13.59
8t2r9b	Old	-11.87	74.02	11.39	21.1	6.6	2.49	-27.41	50.25
8v2z7m	Old	3.07	-14.21	3.12	47.13	-20.61	-40.85	7.98	-18.6
9e1w5k	Old	72.31	65.65	17.64	46.44	40.52	109.74	-15.83	30.99
9s1e4x	Old	5.19	14.06	7.26	20.32	-4.37	53.93	-0.32	7.07
9x1r5h	Old	53.5	16.22	17.57	27.33	11.69	1.42	5.76	22.09
9y1q6a	Old	4.69	11.83	-9.49	-0.02	7.44	35.83	28.06	31.65
1w9e8l	Old	79.73	67.47	46.13	46.24	24.03	37.23	40.68	75.65
Note: subjects colored in red were outliers and therefore excluded from analysis
